# Supplementary figures and images for: Variability in Codon Usage in Coronaviruses Is Mainly Driven by Mutational Bias and Selective Constraints on CpG Dinucleotide
Source: MDPI journal article supplement (doi:10.3390/v13091800), 2021-09-10

**A**

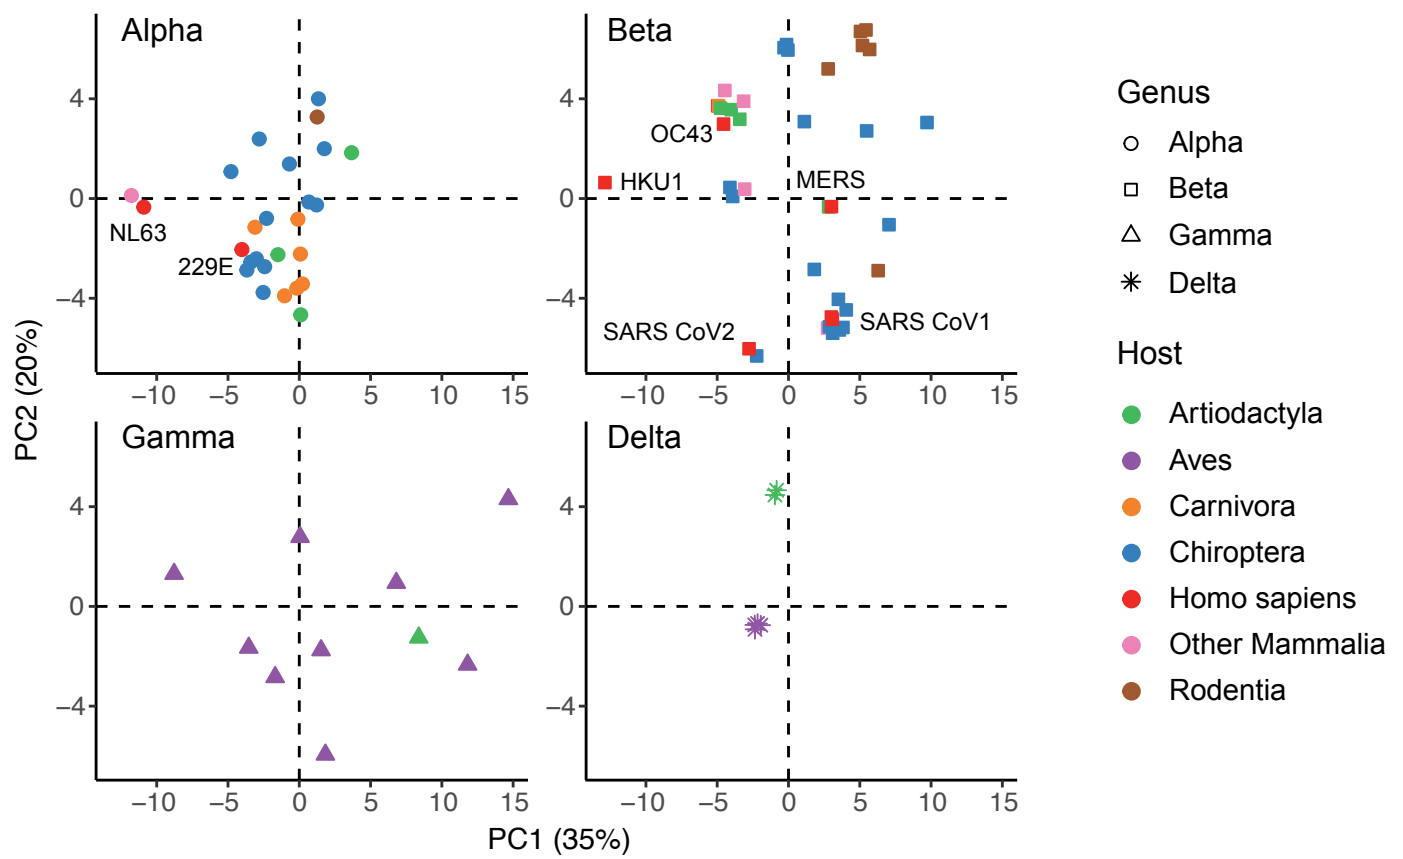

# B

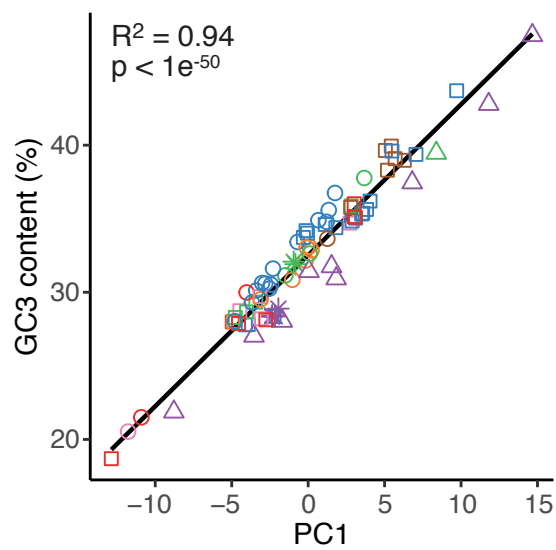

C

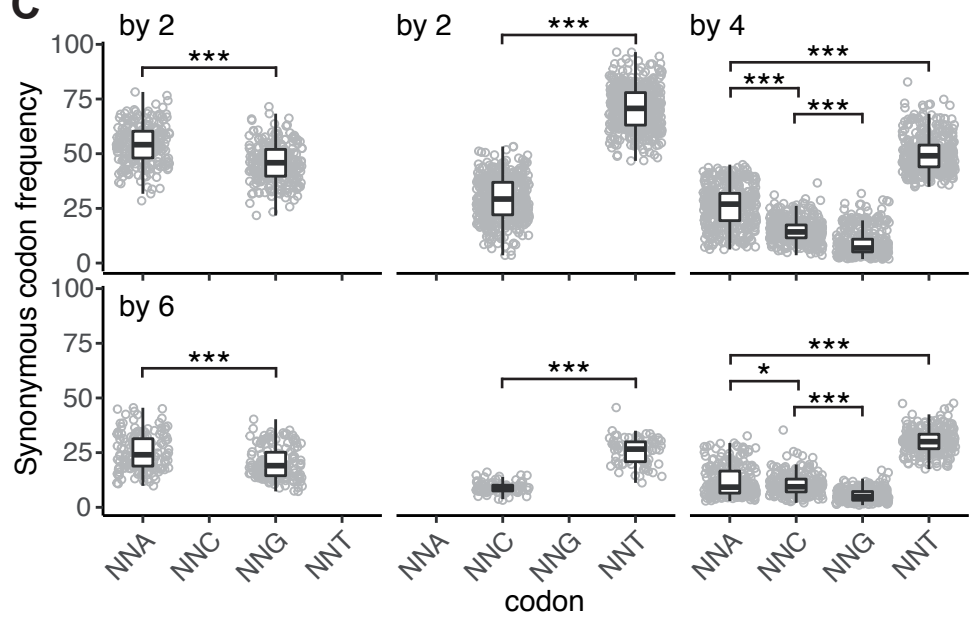

# D

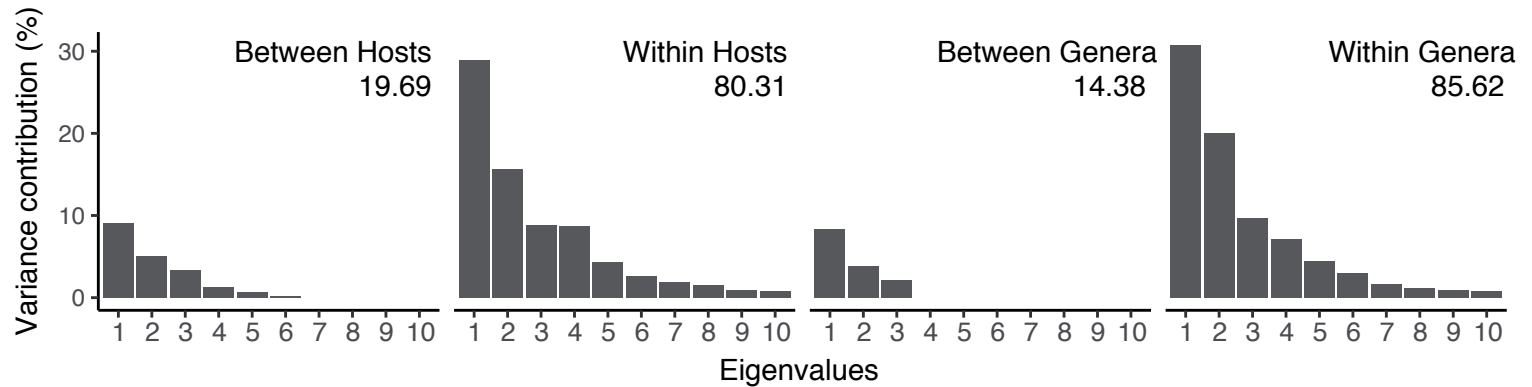

Figure 2

A

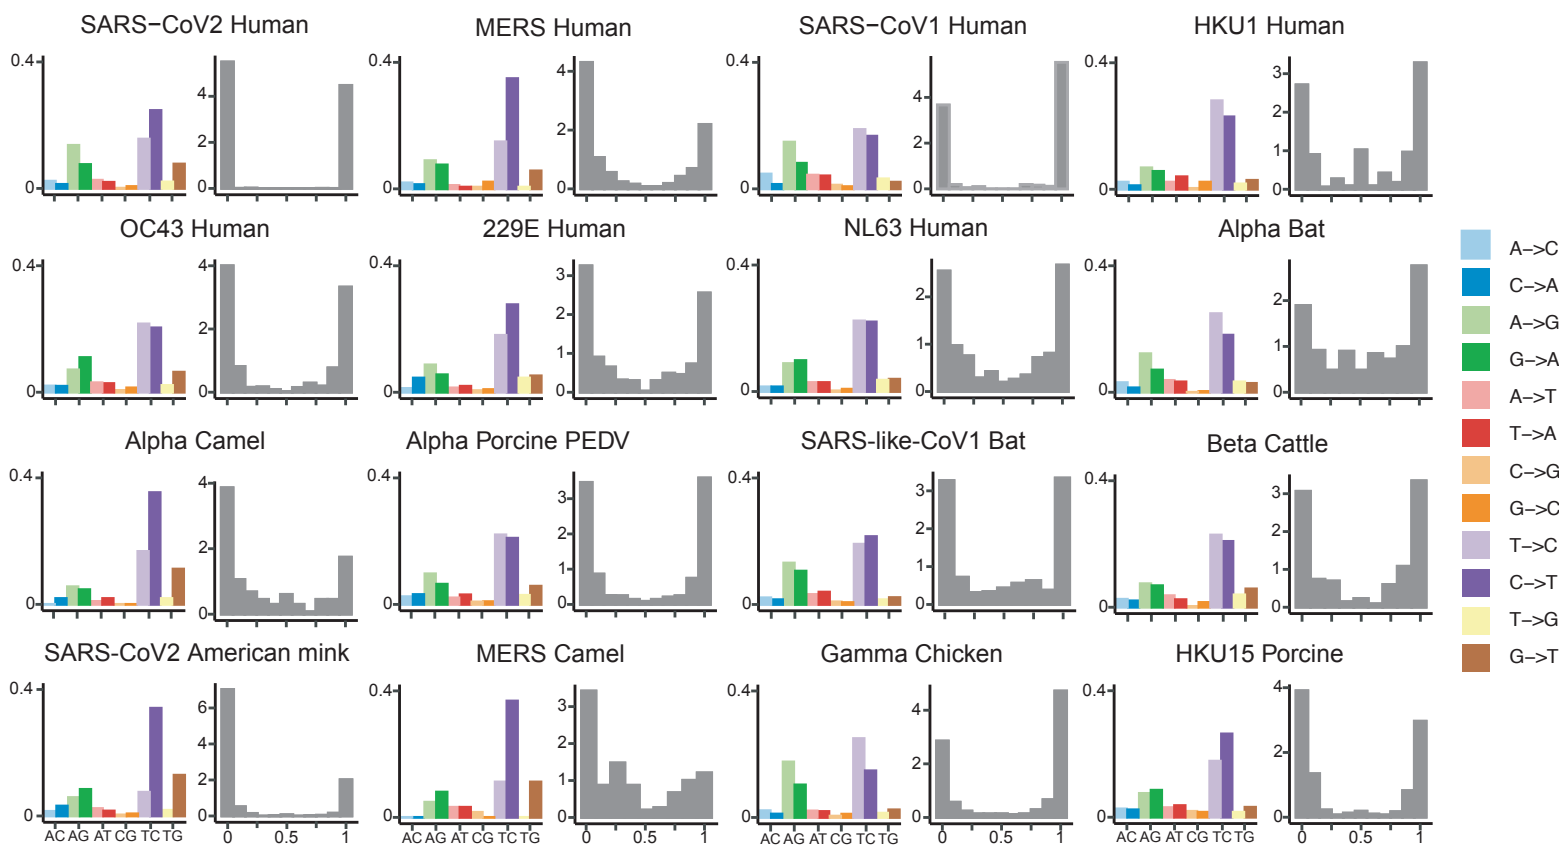

B

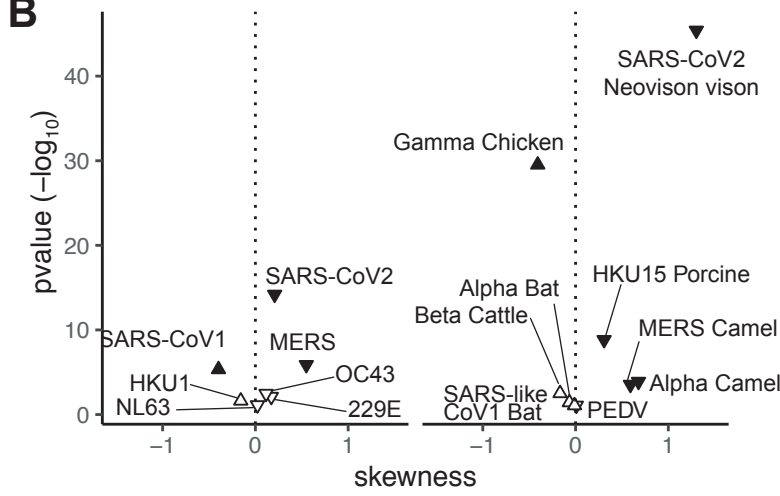

C

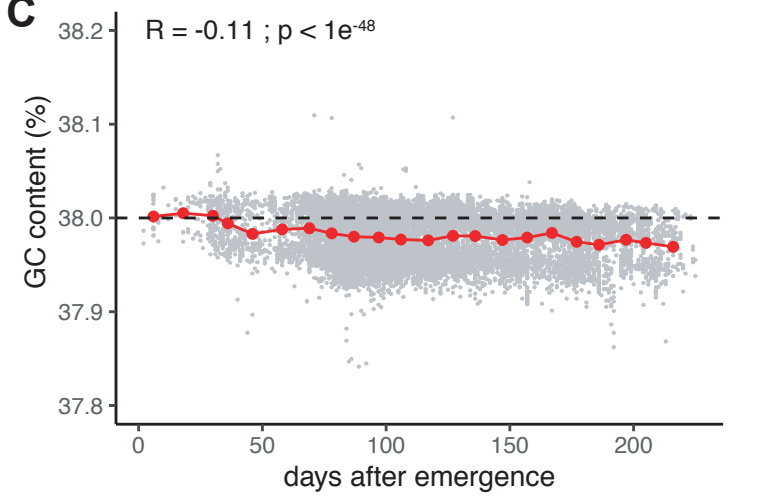

**Figure 3****A**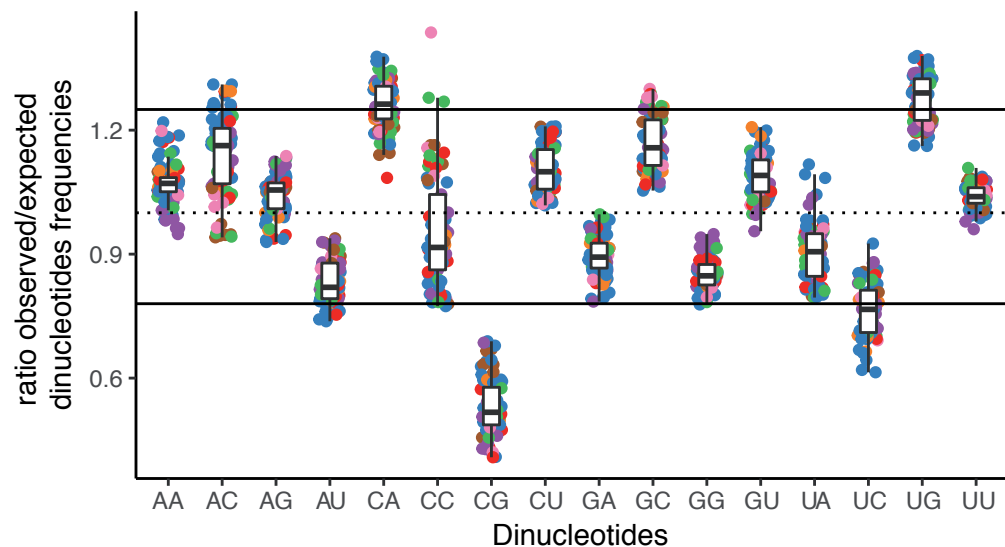**B**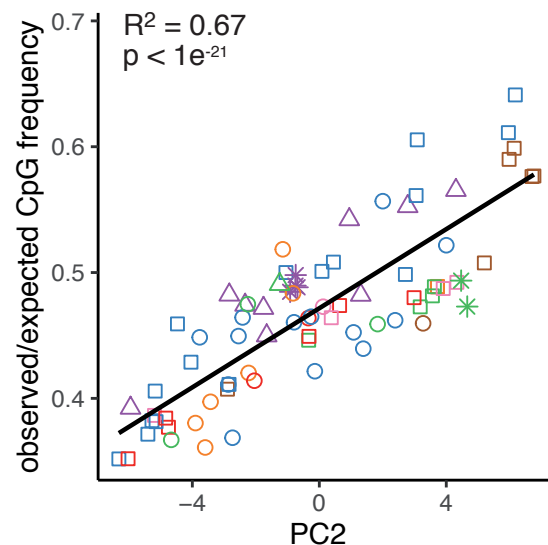**C**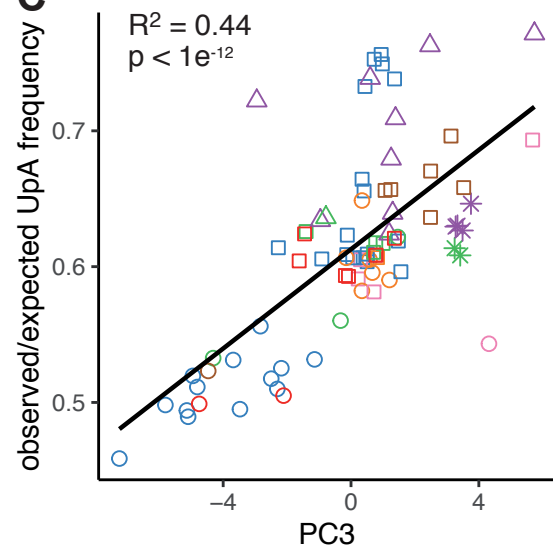**D**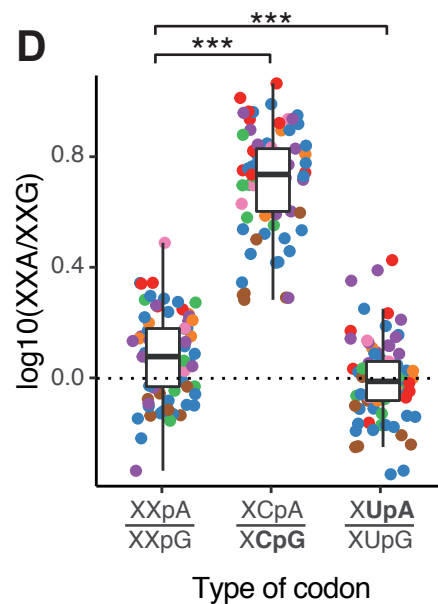**E**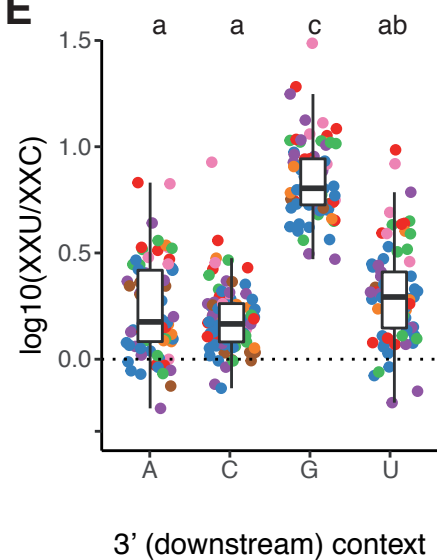

Figure 4

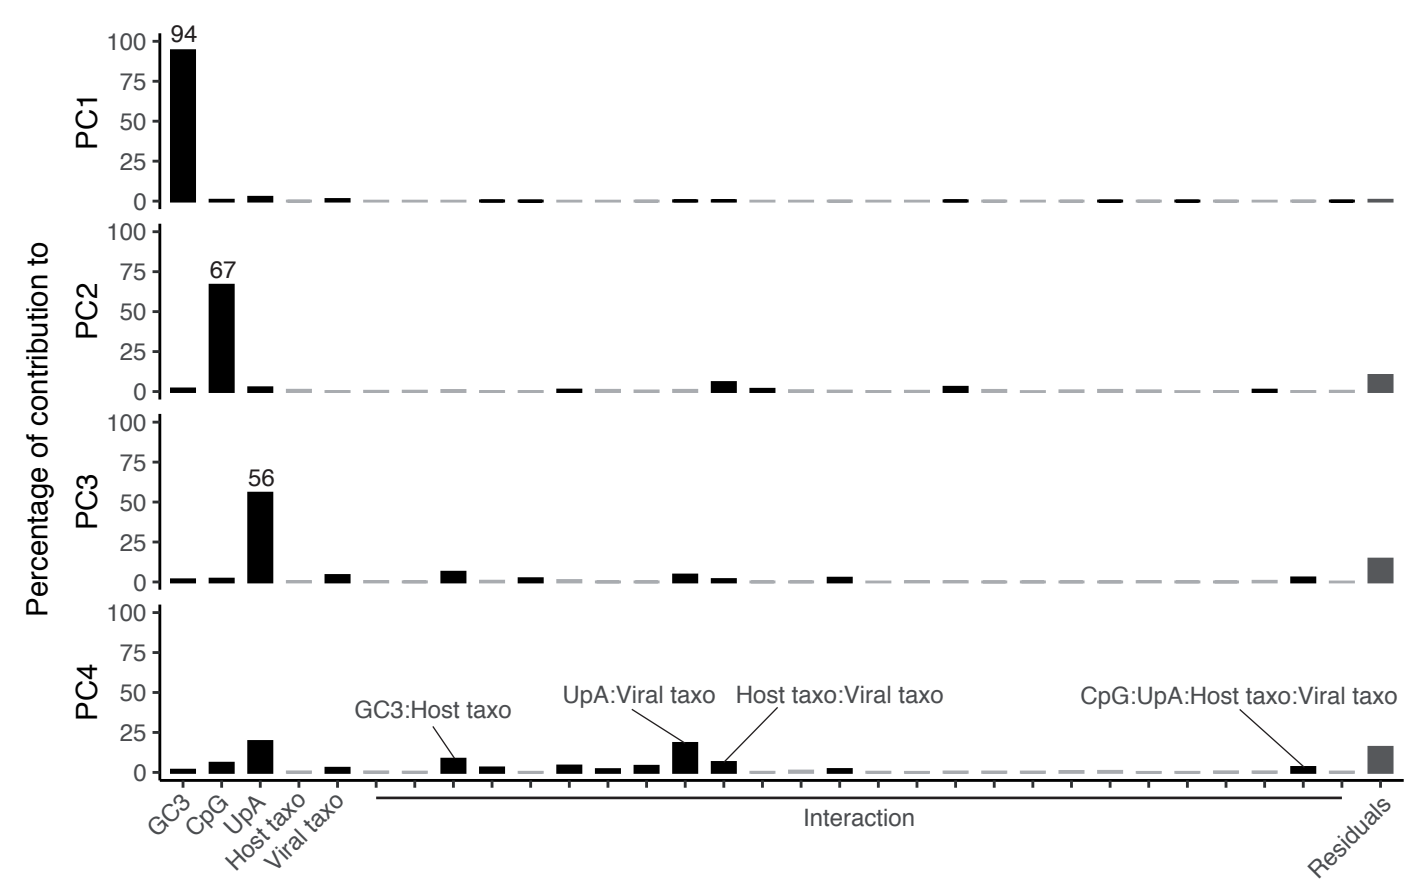

Supplement: s1 [file s1]
